# Supplementary material
Source: PubMed Central journal article supplement (PMC3129171)
Supplement: supp_M111.242016_jbc.M111.242016-1.pdf [file supp_M111.242016_jbc.M111.242016-1.pdf]

## Supplementary Material

### CRYSTAL STRUCTURES OF *STAPHYLOCOCCUS EPIDERMIDIS* MEVALONATE DIPHOSPHATE DECARBOXYLASE BOUND TO INHIBITORY ANALOGS REVEAL NEW INSIGHT INTO SUBSTRATE BINDING AND CATALYSIS\*

Michael L. Barta<sup>‡,1</sup>, D. Andrew Skaff<sup>§,1</sup>, William J. McWhorter<sup>‡</sup>,  
Timothy J. Herdendorf<sup>§</sup>, Henry M. Miziorko<sup>§,2</sup>, and Brian V. Geisbrecht<sup>‡,2</sup>

From Division of Cell Biology and Biophysics<sup>‡</sup>, Molecular Biology and Biochemistry<sup>§</sup>, School of Biological Sciences, University of Missouri-Kansas City; Kansas City, Missouri 64110

Running Head: Inhibitor–mevalonate diphosphate decarboxylase structures

### SUPPLEMENTARY FIGURE LEGENDS

**Fig. S1. Complete structure-based multiple sequence alignment of MDD proteins.** Alignment was generated using ClustalW. Numbers above the sequences correspond to *S. epidermidis* MDD. Red stars below the sequences correspond to invariant amino acid side chains involved in DPGP and FMVAPP interaction, while the green star represents the single variable active site residue.

**Fig. S2. Analytical size-exclusion chromatography of recombinant *S. epidermidis* MDD.** *A*, Purified MDD was injected onto a Tricorn 10/300 Superdex 200 (GE Bioscience) analytical size-exclusion chromatography column and its retention time was compared to a series of globular protein standards (BioRad). *B*, Size-exclusion calibration curve for four globular protein standards. The apparent molecular weight (*M.W.*) for MDD was estimated from observed elution volume (*E.V.*) using the equation:  $M.W.=29,649e^{-0.431 \times E.V.}$ . For an elution volume of 14.05 ml, this yields an apparent molecular weight of 64 kDa.

### SUPPLEMENTARY TABLES

**Tables S1 and S2. Intermolecular contacts between *S. epidermidis* MDD and the inhibitors DPGP and FMVAPP.** Distances for polar contacts between selected atoms of the MDD protein and inhibitors DPGP (Table S1) and FMVAPP (Table S2). In Table S2, distances are shown for both the wild-type and Ser<sup>192</sup>→Ala forms of MDD bound to FMVAPP.



FIG. S2

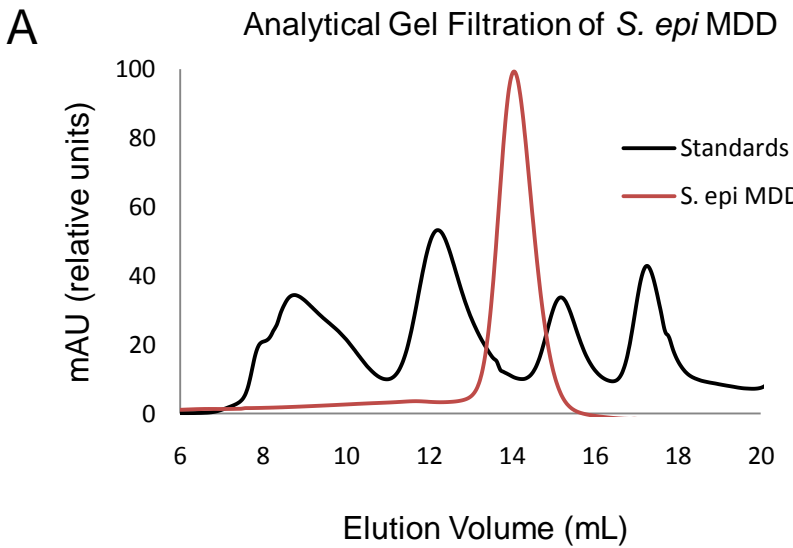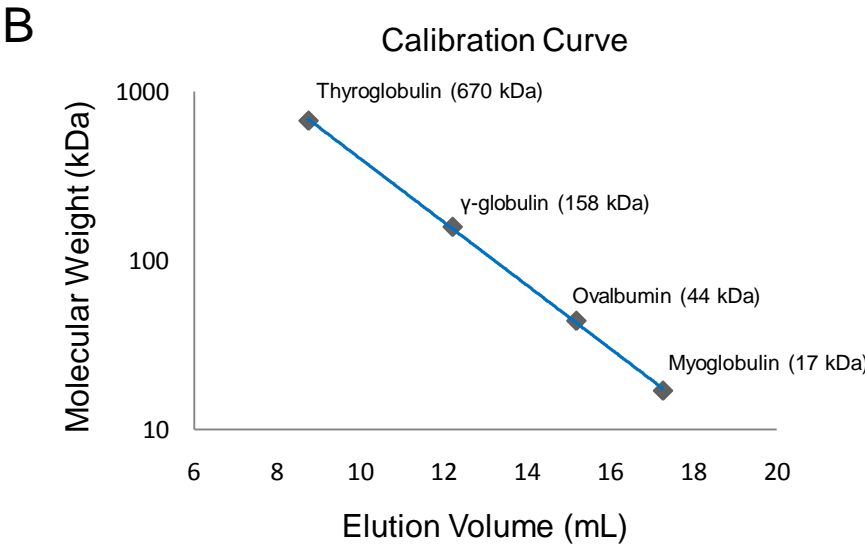

# Supplemental Tables 1 & 2

Table S1. MDD + DPGP Contacts

| Enzyme     |      | Distance (Å) | Inhibitor |              |
|------------|------|--------------|-----------|--------------|
| Amino Acid | Atom | DPGP         | Atom      | Group        |
| Tyr18      | OH   | 2.7          | OAF       | β-phosphoryl |
| Lys21      | NZ   | 2.6          | OAC       | β-phosphoryl |
| Ser107     | OG   | 2.9          | OAD       | α-phosphoryl |
| Ser139     | OG   | 3.1          | OAH       | α-phosphoryl |
| Ser139     | OG   | 3.1          | OAG       | β-phosphoryl |
| Gly140     | N    | 2.9          | OAF       | β-phosphoryl |
| Ser141     | OG   | 2.6          | OAH       | α-phosphoryl |
| Ser141     | N    | 3.1          | OAD       | α-phosphoryl |
| Arg144     | NH2  | 2.8          | O         | Carboxylate  |
| Arg144     | NH1  | 3.1          | O         | Carboxylate  |
| Ser192     | OG   | 3.0          | OAM       | α-phosphoryl |
| Ser192     | OG   | 3.2          | OAB       | C2-hydroxyl  |
| Arg193     | NH2  | 2.9          | OAG       | β-phosphoryl |
| Arg193     | NE   | 2.8          | OAC       | β-phosphoryl |

Table S2. MDD + FMVAPP Contacts

| Enzyme     |      | Distance (Å) |                         | Inhibitor |              |
|------------|------|--------------|-------------------------|-----------|--------------|
| Amino Acid | Atom | FMVAPP       | Ser <sup>192</sup> →Ala | Atom      | Group        |
| Tyr18      | OH   | 2.8          | 2.7                     | OAF       | β-phosphoryl |
| Tyr18      | N    | 2.9          | 2.8                     | OAD       | Carboxylate  |
| Lys21      | NZ   | 2.8          | 2.7                     | OAB       | β-phosphoryl |
| Ser139     | OG   | 3.2          | 3.0                     | OAC       | α-phosphoryl |
| Ser139     | OG   | 2.6          | 2.7                     | OAG       | β-phosphoryl |
| Gly140     | N    | 2.8          | 2.8                     | OAF       | β-phosphoryl |
| Ser141     | OG   | 2.8          | 2.7                     | OAC       | α-phosphoryl |
| Ser141     | N    | 3.0          | 3.0                     | OAC       | α-phosphoryl |
| Arg144     | NH2  | 2.9          | 3.0                     | OAA       | Carboxylate  |
| Arg144     | NH1  | 3.1          | 3.1                     | OAD       | Carboxylate  |
| Ser192     | OG   | 2.8          | N/A                     | OAH       | α-phosphoryl |
| Arg193     | NH2  | 3.1          | 3.0                     | OAG       | β-phosphoryl |
| Arg193     | NE   | 2.7          | 2.7                     | OAB       | β-phosphoryl |
| Asp283     | OD   | 3.4          | 3.6                     | OAE       | C3-hydroxyl  |
| Ala284     | N    | 3.1          | 3.1                     | FAI       | Fluoromethyl |
